# Supplementary material
Source: publisher site journal article supplement (https://www.dovepress.com/get_supplementary_file.php?f=494013.docx)
Supplement: Supplementary file 1 [file get_supplementary_file.php]

**Supplementary File 1. Search strategy.**

| **#** | **Searches** |
| --- | --- |
| 1 | "low-value care"[Title/Abstract] OR misuse*[Title/Abstract] OR overuse*[Title/Abstract] OR "de-implement*"[Title/Abstract] OR "unnecessary"[Title/Abstract] OR "de-adopt*" OR "dis-continu*"[Title/Abstract] OR "ineffective"[Title/Abstract] OR overtreat*[Title/Abstract] OR overdiagnos* OR "no benefit*"[Title/Abstract] OR "choosing wisely"[Title/Abstract] |
| 2 | (("Health Personnel"[Mesh] OR "healthcare professional*"[Title/Abstract])OR nurse*[Title/Abstract] OR physician*[Title/Abstract] OR clinician*[Title/Abstract]) |
| 3 | ("Perception"[Mesh]) OR (perception*[Title/Abstract] OR perspective*[Title/Abstract] OR opinion*[Title/Abstract] OR attitude*[Title/Abstract] OR knowledge[Title/Abstract] OR belief*[Title/Abstract] OR awareness[Title/Abstract] OR readiness[Title/Abstract] OR consciousness[Title/Abstract] OR experiences [Title/Abstract]) |
| 4 | (("Delivery of Health Care"[Mesh] OR healthcare[Title/Abstract] OR "health care"[Title/Abstract] OR "health practice*"[Title/Abstract] OR medic*[Title/Abstract] OR care[Title/Abstract] OR nursing[Title/Abstract] OR service*[Title/Abstract] OR procedur*[Title/Abstract] OR intervention*[Title/Abstract] OR test*[Title/Abstract] OR treatment*[Title/Abstract] OR therapie*[Title/Abstract] OR diagnostic[Title/Abstract] OR policy[Title/Abstract] OR drug*[Title/Abstract] OR prescription[Title/Abstract])) |
| 5 | 1 AND 2 AND 3 AND 4 |
| 6 | Limit 5 to Humans species |
